# Supplementary material
Source: PubMed Central journal article supplement (PMC1194917)

## Degradation vs. Time

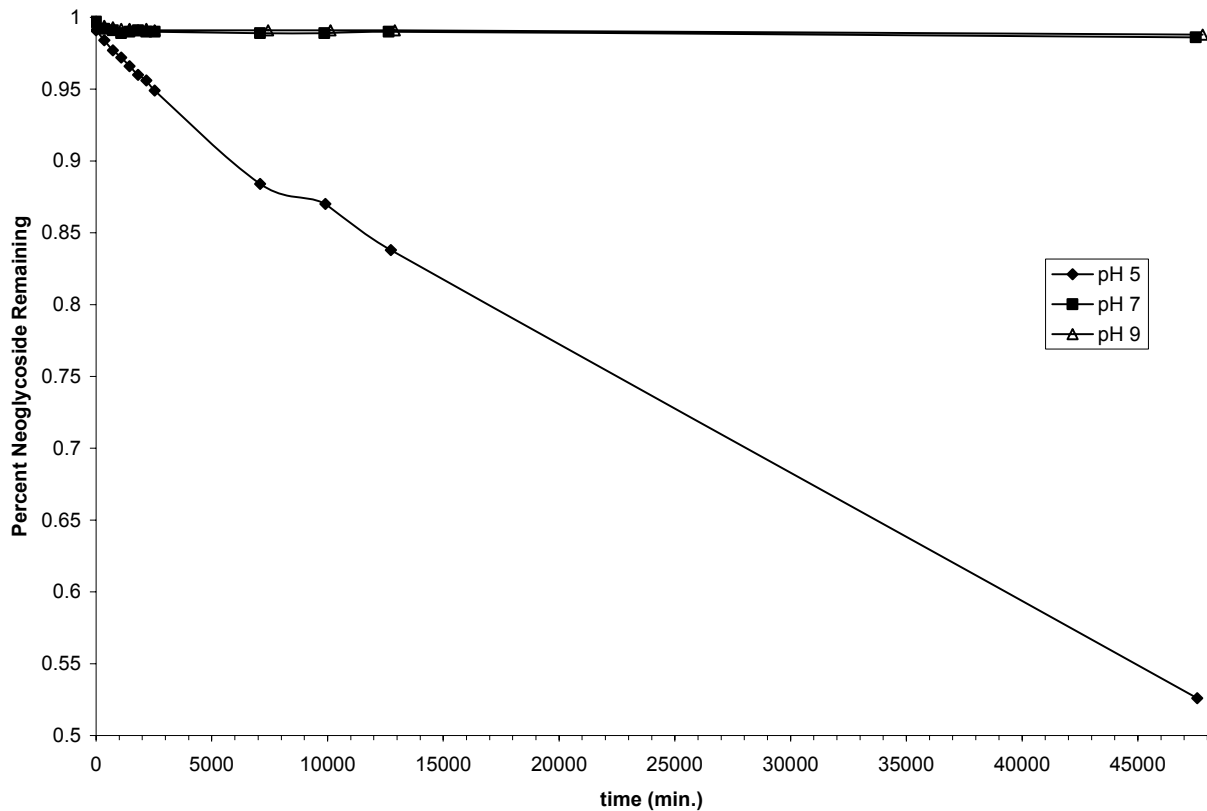

Supplement: pnas_0503270102_1.pdf [file pnas_0503270102_1.pdf]

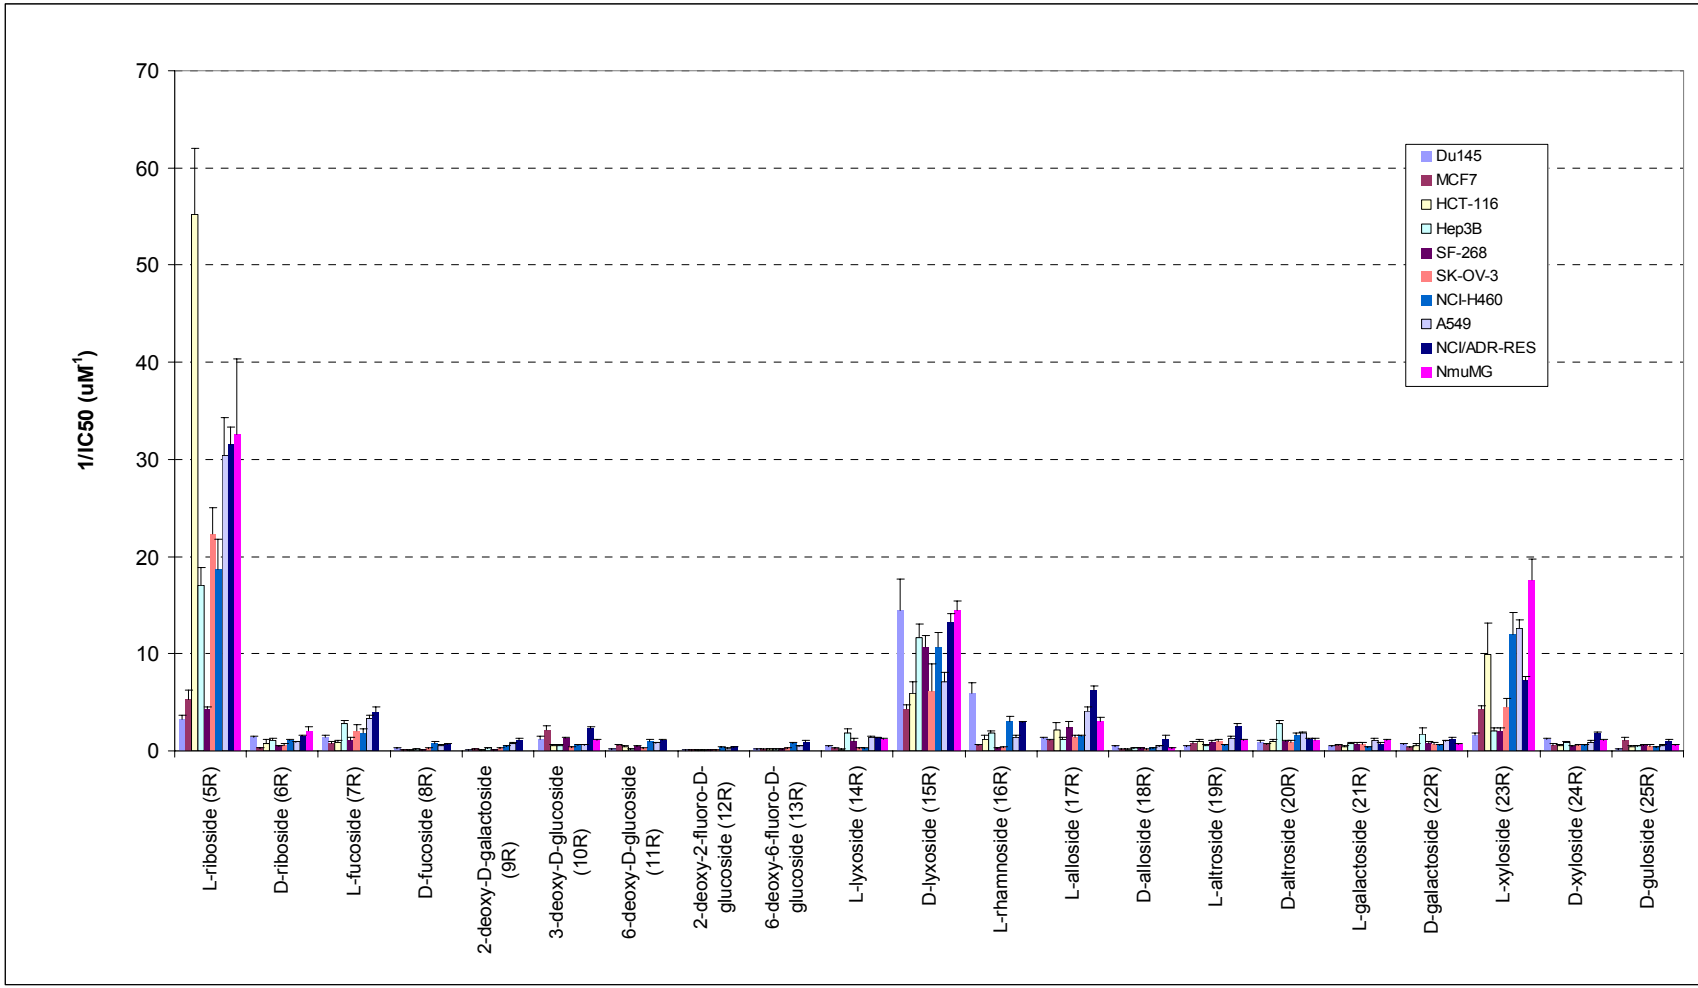

**A**

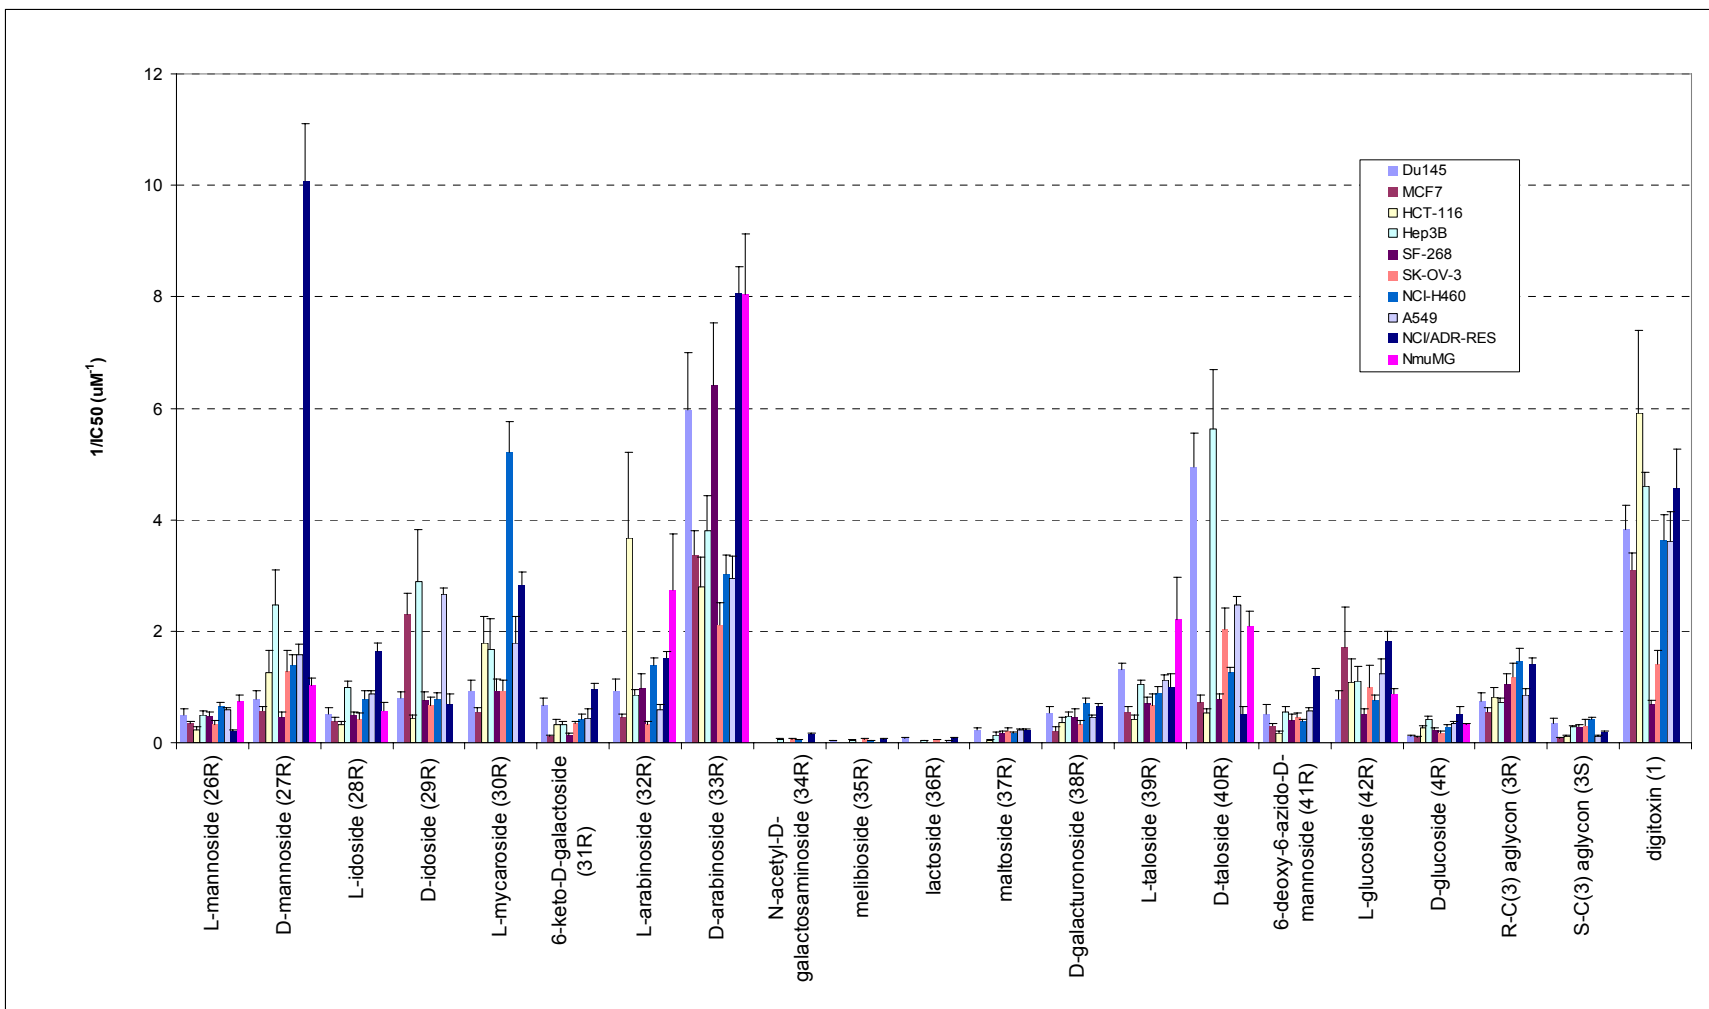

**B**

Supplement: pnas_0503270102_2.pdf [file pnas_0503270102_2.pdf]
